# Supplementary material for: Cross-linked bond accelerated interfacial charge transfer in monolayer zinc indium sulfide (ZnIn2S4)/reduced graphene oxide (RGO) heterostructure for photocatalytic hydrogen production with mechanistic insight
Source: Royal Society of Chemistry journal article supplement (doi:10.1039/c9cy00841a), 2019-01-01
Supplement: c9cy00841a1.pdf [file c9cy00841a1.pdf]

## Supporting Information for

# **Cross-linked bond accelerated interfacial charge transfer in monolayer zinc indium sulfide (ZnIn<sub>2</sub>S<sub>4</sub>) /reduced graphene oxide (RGO) heterostructure for photocatalytic hydrogen production with mechanism insight**

Chun Du, Zhaoyong Lin, Bo Yan and Guowei Yang\*

*State Key Laboratory of Optoelectronic Materials and Technologies, Nanotechnology Research Center, School of Materials Science & Engineering, Sun Yat-sen University, Guangzhou 510275 Guangdong, China.*

\*Corresponding author: stsygw@mail.sysu.edu.cn

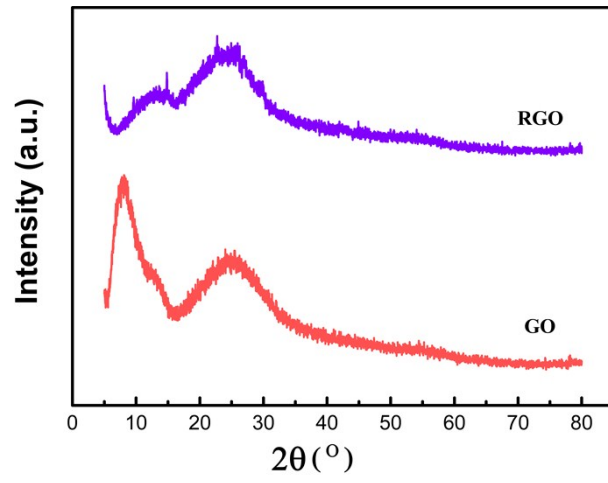

**Figure 1.** XRD patterns of GO and RGO.

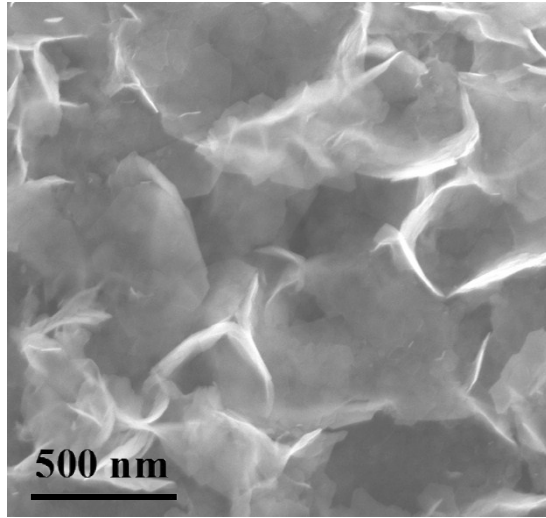

**Figure 2.** SEM image of ZIS.

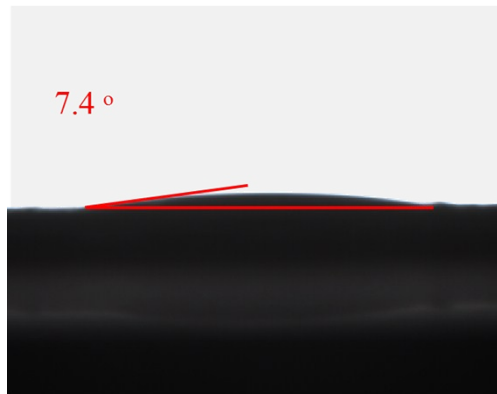

**Figure 3** Static water contact-angle measurement of ZIS.

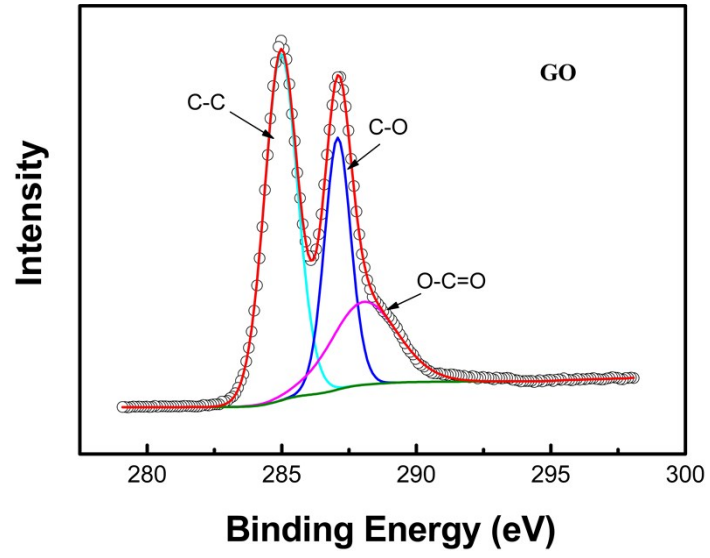

**Figure 4.** C 1s spectra of GO.

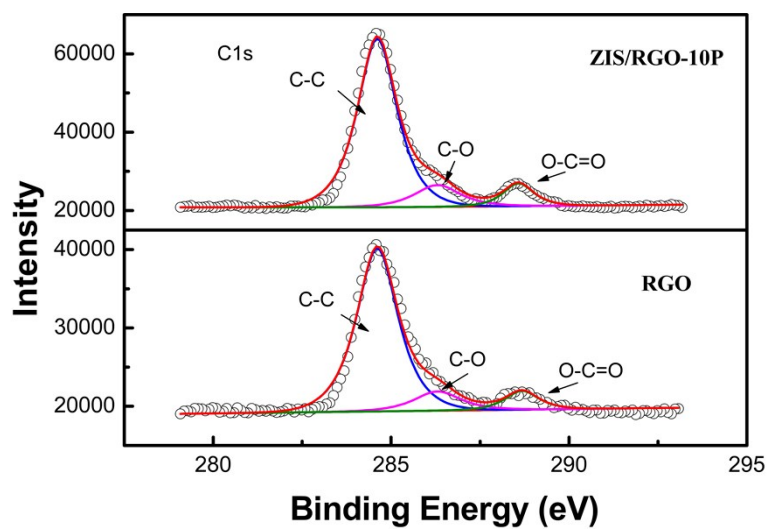

**Figure 5.** C 1s spectra of RGO and ZIS/RGO-10P.

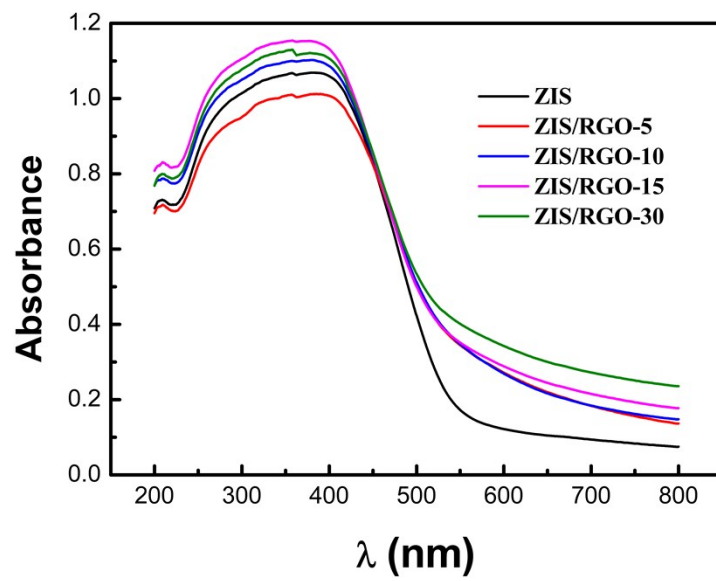

**Figure 6.** UV-vis DRS of the as-prepared samples

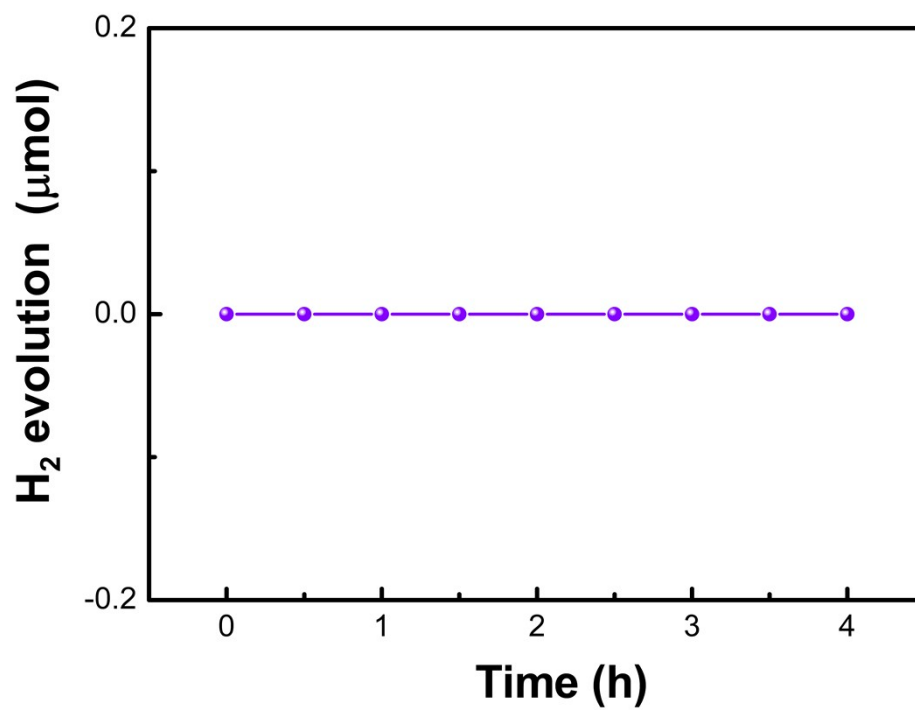

**Figure 7.** Photocatalytic H<sub>2</sub> evolution of RGO



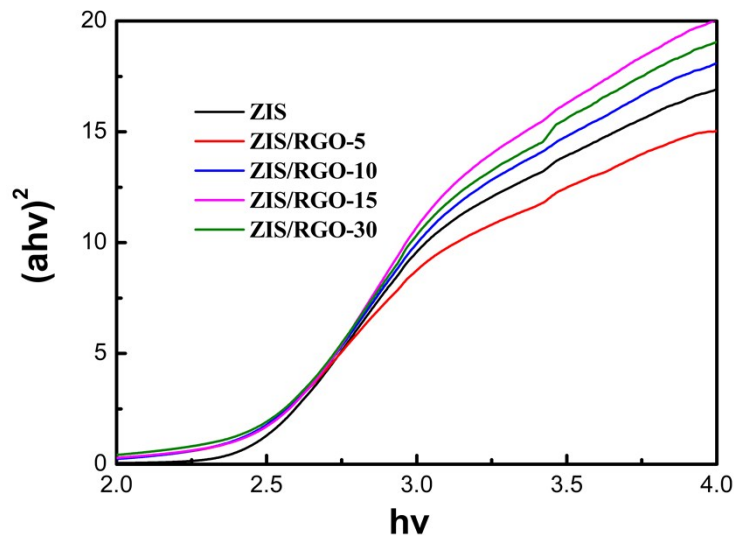

**Figure 8.**  $(\alpha hv)^2$  versus  $(hv)$  plots of the as-prepared samples.

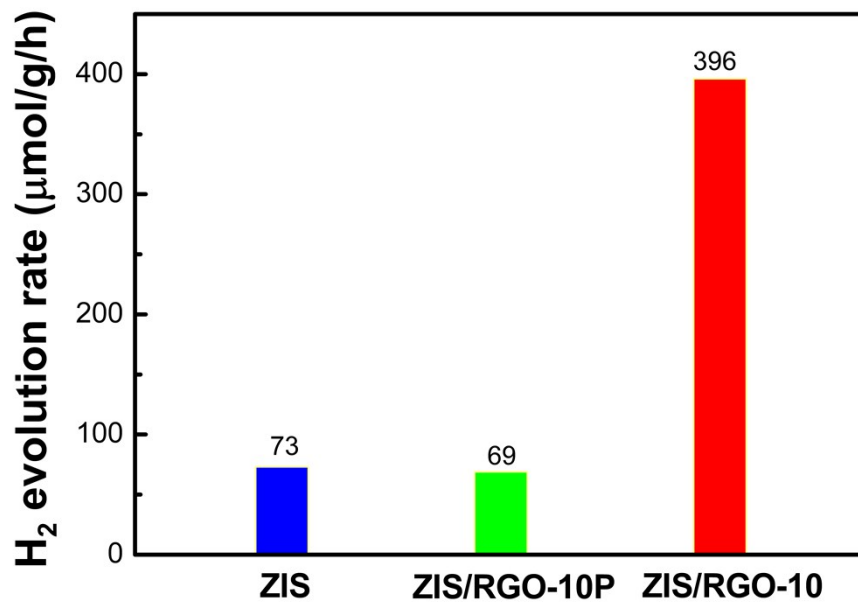

**Figure 9.** H<sub>2</sub> evolution rates of ZIS, ZIS/RGO-10P, and ZIS/RGO-10 under the irradiation of 670 nm

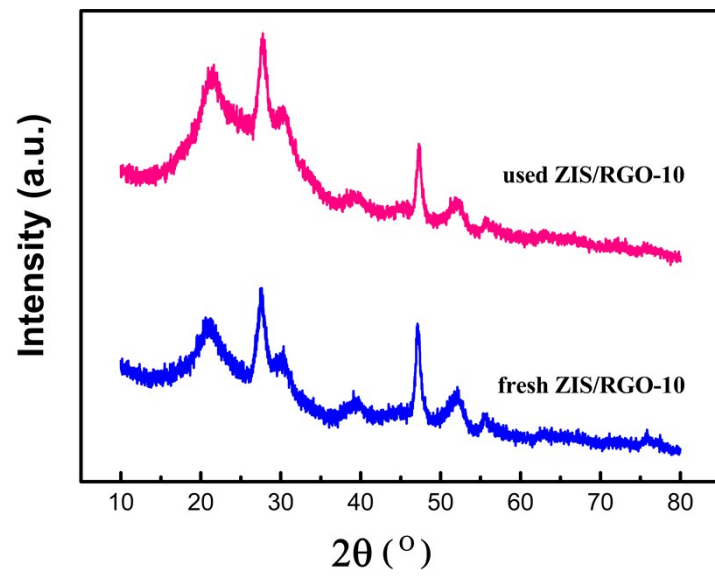

**Figure 10.** XRD pattern of ZIS/RGO-10 before test and after test.

**Table 1.** Comparison about H<sub>2</sub> evolution of the catalysts ZnIn<sub>2</sub>S<sub>4</sub> or ZnIn<sub>2</sub>S<sub>4</sub>-based composites.

| Photocatalysts                                                    | Light source                | Sacrificial agent                                 | H <sub>2</sub> evolution rate (umol/h/g) | Ref.      |
|-------------------------------------------------------------------|-----------------------------|---------------------------------------------------|------------------------------------------|-----------|
| ZnIn <sub>2</sub> S <sub>4</sub>                                  | 300 W Xe lamp<br>(λ >420nm) | Na <sub>2</sub> S/Na <sub>2</sub> SO <sub>3</sub> | 612                                      | 1         |
| ZnIn <sub>2</sub> S <sub>4</sub>                                  | 300 W Xe lamp<br>(λ >420nm) | Triethanolamine                                   | 658                                      | 2         |
| ZnIn <sub>2</sub> S <sub>4</sub>                                  | 300 W Xe lamp<br>(λ >400nm) | Triethanolamine                                   | 546                                      | 3         |
| MoS <sub>2</sub> /ZnIn <sub>2</sub> S <sub>4</sub>                | 300 W Xe lamp<br>(λ >420nm) | Na <sub>2</sub> S/Na <sub>2</sub> SO <sub>3</sub> | 3891.6                                   | 4         |
| g-C <sub>3</sub> N <sub>4</sub> /ZnIn <sub>2</sub> S <sub>4</sub> | 300 W Xe lamp<br>(λ >420nm) | Triethanolamine                                   | 2780                                     | 5         |
| RGO/ZnIn <sub>2</sub> S <sub>4</sub>                              | 300 W Xe lamp<br>(λ >420nm) | Lactic acid                                       | 800                                      | 6         |
| RGO/ZnIn <sub>2</sub> S <sub>4</sub>                              | 300 W Xe lamp<br>(λ >420nm) | Na <sub>2</sub> S/Na <sub>2</sub> SO <sub>3</sub> | 1632                                     | 7         |
| RGO/ZnIn <sub>2</sub> S <sub>4</sub>                              | 300 W Xe lamp<br>(λ >420nm) | Na <sub>2</sub> S/Na <sub>2</sub> SO <sub>3</sub> | 556                                      | 8         |
| RGO/ZnIn <sub>2</sub> S <sub>4</sub>                              | 300 W Xe lamp<br>(λ >420nm) | Lactic acid                                       | 2646                                     | 9         |
| RGO/ZnIn <sub>2</sub> S <sub>4</sub>                              | 300 W Xe lamp<br>(λ >420nm) | Na <sub>2</sub> S/Na <sub>2</sub> SO <sub>3</sub> | 1210                                     | 10        |
| Graphene/ZnIn <sub>2</sub> S <sub>4</sub>                         | 300 W Xe lamp<br>(λ >420nm) | Triethanolamine                                   | 2640.8                                   | 11        |
| MoS <sub>2</sub> -graphene/ZnIn <sub>2</sub> S <sub>4</sub>       | 300 W Xe lamp<br>(λ >420nm) | Na <sub>2</sub> S/Na <sub>2</sub> SO <sub>3</sub> | 4169                                     | 12        |
| RGO/ZnIn <sub>2</sub> S <sub>4</sub>                              | 300 W Xe lamp<br>(λ >400nm) | Triethanolamine                                   | 5064                                     | This work |

## References

1. L. Shang, C. Zhou, T. Bian, H. J. Yu, L. Z. Wu, C. H. Tung and T. R. Zhang, *J. Mater. Chem. A* 2013, **1**, 4552-4558.
2. S. Q. Peng, M. Dan, F. J. Guo, H. M. Wang and Y. X. Li, *Colloid Surface A* 2016, **504**, 18-25.
3. W. J. Li, Z. Y. Lin and G. W. Yang, *Nanoscale* 2017, **9**, 18290-18298.
4. Z. Z. Zhang, L. Huang, J. J. Zhang, F. J. Wang, Y. Y. Xie, X. T. Shang, Y. Y. Gu,

- H. B. Zhao and X. X. Wang, *Appl. Catal. B-Environ.* 2018, **233**, 112-119.
5. B. Lin, H. Li, H. An, W. B. Hao, J. J. Wei, Y. Z. Dai, C. S. Ma and G. D. Yang, *Appl. Catal. B-Environ.* 2018, **220**, 542-552.
6. L. Ye, J. L. Fu, Z. Xu, R. S. Yuan and Z. H. Li, *Acs Appl. Mater. Inter.* 2014, **6** (5), 3483-3490.
7. J. Zhou, G. H. Tian, Y. J. Chen, X. Y. Meng, Y. H. Shi, X. R. Cao, K. Pan and H. G. Fu, *Chem. Commun.* 2013, **49**, 2237-2239.
8. Y. J. Chen, H. Ge, L. Wei, Z. H. Li, R. S. Yuan, P. Liu and X. Z. Fu, *Catal. Sci. Technol.* 2013, **3**, 1712-1717.
9. L. Ye and Z. H. Li, *Appl. Catal. B-Environ.* 2014, **160**, 552-557.
10. F. Tian, R. S. Zhu, J. Zhong, P. Wang, F. Ouyang and G. Cao, *Int. J. Hydrogen Energ.* 2016, **41**, 20156-20171.
11. Y. Xia, Q. Li, K. Lv, D. Tang and M. Li, *Appl. Catal. B- Environ.* 2017, **206**, 344-352.
12. Y. J. Yuan, J. R. Tu, Z. J. Ye, D. Q. Chen, B. Hu, Y. W. Huang, T. T. Chen, D. P. Cao, Z. T. Yu and Z. G. Zou, *Appl. Catal. B-Environ.* 2016, **188**, 13-22.
